# Supplementary material for: Insights into the Gryllus bimaculatus Immune-Related Transcriptomic Profiling to Combat Naturally Invading Pathogens
Source: PubMed Central journal article supplement (PMC7711483; doi:10.3390/jof6040232), 2020-10-18
Supplement: jof-06-00232-s001.pdf [file jof-06-00232-s001.pdf]

**Table S1.** Immune-related Pattern Recognition Receptors from the transcriptome of two-spotted field crickets

| <b>No</b> | <b>Gene Sequence ID</b>   | <b>Annotation description</b>                                   |
|-----------|---------------------------|-----------------------------------------------------------------|
| 1         | TRINITY_DN87689_c0_g8_i1  | <i>Apolipophorin</i>                                            |
| 2         | TRINITY_DN90320_c4_g2_i2  | <i>Apolipophorin-III</i>                                        |
| 3         | TRINITY_DN83083_c0_g3_i1  | <i>Apolipoprotein D</i>                                         |
| 4         | TRINITY_DN87472_c0_g4_i2  | <i>Apolipophorin III 1</i>                                      |
| 5         | TRINITY_DN79329_c2_g3_i2  | <i>ApolipophorinIII 3 isoform B</i>                             |
| 6         | TRINITY_DN87177_c0_g2_i15 | <i>Ataxin-7-like protein 1</i>                                  |
| 7         | TRINITY_DN69311_c0_g2_i1  | <i>Ataxin-2-like protein</i>                                    |
| 8         | TRINITY_DN79241_c0_g1_i1  | <i>Beta-1,3-glucan-binding protein</i>                          |
| 9         | TRINITY_DN66389_c1_g1_i1  | <i>C-type lectin 2</i>                                          |
| 10        | TRINITY_DN80953_c0_g1_i1  | <i>C-type lectin 13</i>                                         |
| 11        | TRINITY_DN62874_c0_g2_i1  | <i>Down syndrome cell adhesion molecule-like protein DSCAM2</i> |
| 12        | TRINITY_DN87557_c4_g2_i2  | <i>Down syndrome cell adhesion molecule-like protein DSCAM2</i> |
| 13        | TRINITY_DN88698_c7_g1_i1  | <i>Endoplasmic reticulum lectin 1</i>                           |
| 14        | TRINITY_DN81707_c0_g1_i3  | <i>Galectin</i>                                                 |
| 15        | TRINITY_DN89270_c1_g1_i3  | <i>Galectin</i>                                                 |
| 16        | TRINITY_DN87548_c0_g1_i1  | <i>GNBP1</i>                                                    |
| 17        | TRINITY_DN88917_c0_g2_i5  | <i>GNBP1</i>                                                    |
| 18        | TRINITY_DN36711_c0_g1_i1  | <i>Hemolymph lipopolysaccharide-binding protein</i>             |
| 19        | TRINITY_DN89574_c1_g2_i1  | <i>Hemolymph lipopolysaccharide-binding protein</i>             |
| 20        | TRINITY_DN84123_c0_g3_i2  | <i>Hemolymph lipopolysaccharide-binding protein</i>             |
| 21        | TRINITY_DN82224_c1_g1_i1  | <i>Hemolymph lipopolysaccharide-binding protein</i>             |
| 22        | TRINITY_DN74207_c0_g1_i1  | <i>Hemolymph lipopolysaccharide-binding protein</i>             |
| 23        | TRINITY_DN89591_c6_g3_i1  | <i>Hemolymph juvenile hormone binding protein</i>               |
| 24        | TRINITY_DN135327_c0_g1_i1 | <i>Hemolymph lipopolysaccharide-binding protein</i>             |
| 25        | TRINITY_DN84754_c0_g1_i1  | <i>Hemolymph juvenile hormone binding protein</i>               |
| 26        | TRINITY_DN86828_c2_g1_i2  | <i>Hemolymph lipopolysaccharide-binding protein</i>             |
| 27        | TRINITY_DN78311_c0_g1_i2  | <i>Hemolymph lipopolysaccharide-binding protein</i>             |
| 28        | TRINITY_DN81298_c1_g4_i1  | <i>Hemolymph lipopolysaccharide-binding protein</i>             |
| 29        | TRINITY_DN77376_c0_g1_i2  | <i>Hemolymph lipopolysaccharide-binding protein</i>             |
| 30        | TRINITY_DN86828_c1_g3_i1  | <i>Hemolymph lipopolysaccharide-binding protein</i>             |
| 31        | TRINITY_DN81584_c0_g1_i2  | <i>Hemolymph lipopolysaccharide-binding protein</i>             |
| 32        | TRINITY_DN129665_c0_g1_i1 | <i>Hemolymph lipopolysaccharide-binding protein</i>             |
| 33        | TRINITY_DN81273_c0_g10_i1 | <i>Hemolymph lipopolysaccharide-binding protein</i>             |

---

|    |                           |                                                          |
|----|---------------------------|----------------------------------------------------------|
| 34 | TRINITY_DN86913_c0_g3_i2  | <i>Hemolymph lipopolysaccharide-binding protein</i>      |
| 35 | TRINITY_DN89840_c0_g1_i1  | <i>Hemolymph lipopolysaccharide-binding protein</i>      |
| 36 | TRINITY_DN40040_c0_g1_i1  | <i>Hemolymph lipopolysaccharide-binding protein</i>      |
| 37 | TRINITY_DN88441_c2_g1_i2  | <i>Immulectin 9</i>                                      |
| 38 | TRINITY_DN87890_c0_g1_i7  | <i>Immulectin 5</i>                                      |
| 39 | TRINITY_DN81407_c1_g1_i2  | <i>Immulectin 11</i>                                     |
| 40 | TRINITY_DN144682_c0_g1_i1 | <i>Immulectin-2a</i>                                     |
| 41 | TRINITY_DN87545_c2_g11_i1 | <i>Immulectin 5</i>                                      |
| 42 | TRINITY_DN84460_c2_g3_i2  | <i>Immunolectin-A</i>                                    |
| 43 | TRINITY_DN81721_c1_g1_i1  | <i>Lectin-related protein</i>                            |
| 44 | TRINITY_DN81298_c0_g3_i1  | <i>Lectin-related protein</i>                            |
| 45 | TRINITY_DN81584_c0_g2_i1  | <i>Lectin-related protein (Fragment)</i>                 |
| 46 | TRINITY_DN83725_c2_g2_i1  | <i>Peptidoglycan-recognition protein</i>                 |
| 47 | TRINITY_DN81082_c0_g1_i1  | <i>Peptidoglycan-recognition protein LE-like Protein</i> |
| 48 | TRINITY_DN83462_c0_g1_i1  | <i>Peptidoglycan-recognition protein 1</i>               |
| 49 | TRINITY_DN80566_c0_g1_i1  | <i>Regenectin</i>                                        |
| 50 | TRINITY_DN14747_c0_g1_i1  | <i>Regenectin</i>                                        |
| 51 | TRINITY_DN87571_c3_g8_i3  | <i>Regenectin</i>                                        |
| 52 | TRINITY_DN160647_c0_g1_i1 | <i>Putative scavenger receptor</i>                       |
| 53 | TRINITY_DN88582_c2_g1_i1  | <i>Scavenger receptor class B member, putative</i>       |
| 54 | TRINITY_DN85652_c0_g1_i1  | <i>Scavenger receptor class B member 1</i>               |
| 55 | TRINITY_DN87011_c0_g1_i1  | <i>Scavenger receptor class B member 1</i>               |
| 56 | TRINITY_DN84375_c5_g1_i1  | <i>Scavenger receptor class B member 1-like</i>          |
| 57 | TRINITY_DN74266_c0_g1_i1  | <i>Septin</i>                                            |
| 58 | TRINITY_DN89316_c1_g8_i2  | <i>Spondin-1</i>                                         |
| 59 | TRINITY_DN66908_c0_g2_i1  | <i>Techylectin-5B</i>                                    |
| 60 | TRINITY_DN81298_c2_g1_i1  | <i>26-kDa lectin</i>                                     |
| 61 | TRINITY_DN87545_c2_g16_i1 | <i>26-kDa lectin</i>                                     |
| 62 | TRINITY_DN86828_c1_g1_i1  | <i>26-kDa lectin</i>                                     |

---

**Table S2.** Immune-related Signal Modulators from the transcriptome of two-spotted field crickets

| <b>No</b> | <b>Gene Sequence ID</b>   | <b>Annotation description</b>                     |
|-----------|---------------------------|---------------------------------------------------|
| 1         | TRINITY_DN90050_c0_g1_i1  | <i>Allatotropin receptor</i>                      |
| 2         | TRINITY_DN82291_c1_g2_i1  | <i>Allatostatin receptor</i>                      |
| 3         | TRINITY_DN85577_c0_g2_i1  | <i>Angiotensin-1 receptor</i>                     |
| 4         | TRINITY_DN89599_c1_g2_i1  | <i>Chymotrypsin</i>                               |
| 5         | TRINITY_DN82706_c2_g1_i1  | <i>Chymotrypsin</i>                               |
| 6         | TRINITY_DN89257_c2_g11_i1 | <i>Chymotrypsin</i>                               |
| 7         | TRINITY_DN81498_c0_g2_i1  | <i>Chymotrypsin</i>                               |
| 8         | TRINITY_DN90501_c0_g2_i2  | <i>Chymotrypsin 12</i>                            |
| 9         | TRINITY_DN83010_c1_g5_i1  | <i>Chymotrypsin-like protein</i>                  |
| 10        | TRINITY_DN83662_c0_g1_i3  | <i>Chymotrypsin BI</i>                            |
| 11        | TRINITY_DN102153_c0_g1_i1 | <i>GHKL domain-containing protein</i>             |
| 12        | TRINITY_DN83100_c0_g2_i1  | <i>Kazal domain-containing peptide</i>            |
| 13        | TRINITY_DN78176_c0_g1_i1  | <i>Kazal domain-containing peptide</i>            |
| 14        | TRINITY_DN146932_c0_g1_i1 | <i>Kunitz-type protease inhibitor 4 isoform B</i> |
| 15        | TRINITY_DN133622_c0_g1_i1 | <i>Porin</i>                                      |
| 16        | TRINITY_DN86437_c8_g1_i2  | <i>Prophenoloxidase</i>                           |
| 17        | TRINITY_DN86437_c7_g1_i1  | <i>Prophenoloxidase</i>                           |
| 18        | TRINITY_DN63594_c0_g1_i2  | <i>Phenoloxidase 2-like</i>                       |
| 19        | TRINITY_DN86437_c7_g2_i2  | <i>Pro-phenoloxidase 1</i>                        |
| 20        | TRINITY_DN87219_c10_g1_i2 | <i>Prostaglandin E synthase 2</i>                 |
| 21        | TRINITY_DN89738_c1_g7_i6  | <i>Serine protease 1</i>                          |
| 22        | TRINITY_DN76928_c0_g1_i1  | <i>Serine protease 3</i>                          |
| 23        | TRINITY_DN79060_c0_g2_i2  | <i>Serine protease</i>                            |
| 24        | TRINITY_DN129705_c0_g1_i1 | <i>Serine protease</i>                            |
| 25        | TRINITY_DN80081_c0_g1_i1  | <i>Serine protease</i>                            |
| 26        | TRINITY_DN82393_c0_g1_i3  | <i>Serine protease</i>                            |
| 27        | TRINITY_DN90709_c15_g1_i1 | <i>Serine protease</i>                            |
| 28        | TRINITY_DN84137_c0_g2_i1  | <i>Serine protease</i>                            |
| 29        | TRINITY_DN90709_c13_g5_i1 | <i>Serine protease</i>                            |
| 30        | TRINITY_DN86192_c2_g15_i1 | <i>Serine protease</i>                            |
| 31        | TRINITY_DN90709_c14_g1_i1 | <i>Serine protease</i>                            |
| 32        | TRINITY_DN78833_c0_g1_i1  | <i>Serine protease</i>                            |
| 33        | TRINITY_DN85446_c1_g3_i1  | <i>Serine protease</i>                            |
| 34        | TRINITY_DN86838_c0_g11_i4 | <i>Serine protease</i>                            |
| 35        | TRINITY_DN90326_c6_g5_i1  | <i>Serine protease</i>                            |

---

|    |                           |                                              |
|----|---------------------------|----------------------------------------------|
| 36 | TRINITY_DN82387_c0_g1_i1  | <i>Serine protease</i>                       |
| 37 | TRINITY_DN102626_c0_g1_i1 | <i>Serine proteinase stubble</i>             |
| 38 | TRINITY_DN87778_c0_g1_i2  | <i>Serine protease gd</i>                    |
| 39 | TRINITY_DN87612_c0_g5_i2  | <i>Serine protease P69</i>                   |
| 40 | TRINITY_DN88358_c0_g1_i1  | <i>Serine protease 62</i>                    |
| 41 | TRINITY_DN88307_c1_g2_i3  | <i>Serine protease 14</i>                    |
| 42 | TRINITY_DN39487_c0_g1_i1  | <i>Serine protease 26</i>                    |
| 43 | TRINITY_DN167817_c0_g1_i1 | <i>Serine protease, S9A family peptidase</i> |
| 44 | TRINITY_DN78414_c0_g1_i1  | <i>Serine protease 38</i>                    |
| 45 | TRINITY_DN89946_c0_g3_i1  | <i>Serpin</i>                                |
| 46 | TRINITY_DN85610_c1_g1_i3  | <i>Serpin B4</i>                             |
| 47 | TRINITY_DN88860_c0_g1_i2  | <i>Serpin I2</i>                             |
| 48 | TRINITY_DN88170_c1_g1_i1  | <i>Serpin protein</i>                        |
| 49 | TRINITY_DN88170_c1_g3_i3  | <i>Serpin 5</i>                              |
| 50 | TRINITY_DN90032_c1_g3_i3  | <i>Serpin B8</i>                             |
| 51 | TRINITY_DN89804_c1_g2_i1  | <i>Tetraspanin</i>                           |
| 52 | TRINITY_DN88187_c4_g2_i4  | <i>Tetraspanin</i>                           |
| 53 | TRINITY_DN88045_c3_g1_i3  | <i>Tetraspanin</i>                           |
| 54 | TRINITY_DN81053_c1_g1_i3  | <i>Tetraspanin</i>                           |
| 55 | TRINITY_DN61731_c0_g1_i1  | <i>Tetraspanin</i>                           |
| 56 | TRINITY_DN166583_c0_g1_i1 | <i>Tetraspanin</i>                           |
| 57 | TRINITY_DN79958_c0_g2_i5  | <i>Trypsin-like serine protease</i>          |

---

**Table S3.** Immune-related Signal Transducers from the transcriptome of two-spotted field crickets

| <b>No</b> | <b>Gene Sequence ID</b>   | <b>Annotation description</b>                                              |
|-----------|---------------------------|----------------------------------------------------------------------------|
| 1         | TRINITY_DN79345_c0_g1_i3  | <i>Adiponectin receptor protein</i>                                        |
| 2         | TRINITY_DN84102_c0_g1_i2  | <i>Allatostatin A prohormone</i>                                           |
| 3         | TRINITY_DN91028_c20_g3_i3 | <i>Ankyrin repeat and fibronectin type-III domain-containing protein 1</i> |
| 4         | TRINITY_DN85533_c1_g2_i1  | <i>Angiomotin</i>                                                          |
| 5         | TRINITY_DN90655_c0_g2_i1  | <i>Beta-arrestin2</i>                                                      |
| 6         | TRINITY_DN76807_c0_g2_i1  | <i>Bursicon-beta</i>                                                       |
| 7         | TRINITY_DN66564_c0_g2_i1  | <i>C2 domain-containing protein</i>                                        |
| 8         | TRINITY_DN66503_c0_g1_i1  | <i>C2 domain protein</i>                                                   |
| 9         | TRINITY_DN110565_c0_g1_i1 | <i>C2 domain protein</i>                                                   |
| 10        | TRINITY_DN15032_c0_g1_i1  | <i>CSN5 cop9 signalosome subunit 5</i>                                     |
| 11        | TRINITY_DN85088_c1_g1_i8  | <i>C-Jun-amino-terminal kinase-interacting protein 3</i>                   |
| 12        | TRINITY_DN49469_c0_g1_i1  | <i>Calmodulin-domain protein kinase</i>                                    |
| 13        | TRINITY_DN129478_c0_g1_i1 | <i>Calmodulin putative</i>                                                 |
| 14        | TRINITY_DN80828_c0_g1_i14 | <i>Cactin</i>                                                              |
| 15        | TRINITY_DN89760_c0_g1_i5  | <i>Calmodulin</i>                                                          |
| 16        | TRINITY_DN88139_c1_g1_i4  | <i>Calmodulin-binding transcription activator 1</i>                        |
| 17        | TRINITY_DN80518_c0_g1_i2  | <i>Calmodulin-like protein 4</i>                                           |
| 18        | TRINITY_DN110393_c0_g1_i1 | <i>Calmodulin cam-206</i>                                                  |
| 19        | TRINITY_DN90586_c1_g1_i9  | <i>Calpain 1</i>                                                           |
| 20        | TRINITY_DN83104_c1_g2_i2  | <i>Calpain-A</i>                                                           |
| 21        | TRINITY_DN86114_c0_g2_i22 | <i>Calpain-B</i>                                                           |
| 22        | TRINITY_DN84320_c3_g1_i4  | <i>Calpain-7</i>                                                           |
| 23        | TRINITY_DN81402_c0_g1_i3  | <i>Calpain-A</i>                                                           |
| 24        | TRINITY_DN165025_c0_g1_i1 | <i>Calpain-7</i>                                                           |
| 25        | TRINITY_DN86876_c0_g2_i2  | <i>Calpain-7-like protein</i>                                              |
| 26        | TRINITY_DN86519_c2_g2_i2  | <i>Calpain-1 catalytic subunit</i>                                         |
| 27        | TRINITY_DN164900_c0_g1_i1 | <i>Calpain family cysteine protease domain-containing protein</i>          |
| 28        | TRINITY_DN87120_c3_g4_i13 | <i>Catenin delta-2</i>                                                     |
| 29        | TRINITY_DN178203_c0_g1_i1 | <i>Chimaerin</i>                                                           |
| 30        | TRINITY_DN81696_c0_g1_i1  | <i>Contactin</i>                                                           |
| 31        | TRINITY_DN70953_c0_g2_i1  | <i>COP9 signalosome complex subunit 3</i>                                  |
| 32        | TRINITY_DN88541_c0_g7_i1  | <i>COP9 signalosome complex subunit 4</i>                                  |
| 33        | TRINITY_DN88946_c1_g3_i4  | <i>COP9 signalosome complex subunit 5</i>                                  |
| 34        | TRINITY_DN84795_c0_g1_i1  | <i>COP9 signalosome complex subunit 6</i>                                  |
| 35        | TRINITY_DN84947_c1_g1_i2  | <i>COP9 signalosome complex subunit 7a</i>                                 |

---

|    |                           |                                                                                 |
|----|---------------------------|---------------------------------------------------------------------------------|
| 36 | TRINITY_DN83545_c1_g1_i3  | <i>COP9 signalosome complex subunit 1</i>                                       |
| 37 | TRINITY_DN81987_c0_g2_i2  | <i>COP9 signalosome complex subunit 2</i>                                       |
| 38 | TRINITY_DN79343_c0_g1_i1  | <i>EF-hand domain-containing protein 1-like</i>                                 |
| 39 | TRINITY_DN85586_c1_g7_i1  | <i>EF-hand domain containing protein</i>                                        |
| 40 | TRINITY_DN81079_c0_g1_i1  | <i>EF-hand calcium-binding domain-containing protein 2</i>                      |
| 41 | TRINITY_DN15974_c0_g1_i1  | <i>EF hand domain-containing protein, putative</i>                              |
| 42 | TRINITY_DN32770_c0_g1_i1  | <i>EF hand domain-containing protein</i>                                        |
| 43 | TRINITY_DN84200_c1_g2_i2  | <i>EF-hand calcium-binding domain-containing protein 4B</i>                     |
| 44 | TRINITY_DN93947_c0_g1_i1  | <i>EF hand domain-containing protein</i>                                        |
| 45 | TRINITY_DN32770_c0_g2_i1  | <i>EF hand domain-containing protein</i>                                        |
| 46 | TRINITY_DN161113_c0_g1_i1 | <i>EF hand domain-containing protein</i>                                        |
| 47 | TRINITY_DN23059_c0_g1_i1  | <i>EF hand domain-containing protein</i>                                        |
| 48 | TRINITY_DN82619_c0_g1_i2  | <i>EF-hand domain-containing family member C2</i>                               |
| 49 | TRINITY_DN78934_c0_g2_i1  | <i>Folliculin</i>                                                               |
| 50 | TRINITY_DN87350_c4_g6_i4  | <i>Four-and-a-half LIM domain protein 1 isoform B</i>                           |
| 51 | TRINITY_DN88862_c4_g7_i1  | <i>Frizzled-7</i>                                                               |
| 52 | TRINITY_DN177906_c0_g1_i1 | <i>Frizzled-10-B</i>                                                            |
| 53 | TRINITY_DN81654_c0_g1_i2  | <i>Frizzled-related protein</i>                                                 |
| 54 | TRINITY_DN85257_c0_g2_i2  | <i>Gamma-tubulin complex component</i>                                          |
| 55 | TRINITY_DN79544_c0_g1_i1  | <i>Hedgehog protein</i>                                                         |
| 56 | TRINITY_DN89592_c1_g3_i2  | <i>Hippo</i>                                                                    |
| 57 | TRINITY_DN84269_c7_g7_i1  | <i>Hippocampus abundant transcript 1 protein</i>                                |
| 58 | TRINITY_DN90160_c6_g2_i2  | <i>IMD-like protein</i>                                                         |
| 59 | TRINITY_DN89357_c0_g4_i1  | <i>JNK-interacting protein 1</i>                                                |
| 60 | TRINITY_DN81682_c0_g1_i2  | <i>JNK-interacting protein 1</i>                                                |
| 61 | TRINITY_DN81843_c0_g3_i1  | <i>JNK1-associated membrane protein</i>                                         |
| 62 | TRINITY_DN88444_c11_g1_i1 | <i>Kruppel-like protein 1</i>                                                   |
| 63 | TRINITY_DN89472_c0_g3_i3  | <i>Leucine-rich repeat-containing protein 68</i>                                |
| 64 | TRINITY_DN88837_c3_g7_i1  | <i>Leucine-rich repeat and fibronectin type III domain-containing protein 1</i> |
| 65 | TRINITY_DN86086_c2_g2_i2  | <i>Leucine-rich repeat-containing protein</i>                                   |
| 66 | TRINITY_DN88614_c0_g4_i2  | <i>Leucine-rich repeat-containing protein 57</i>                                |
| 67 | TRINITY_DN82320_c0_g1_i1  | <i>Leucine-rich repeat protein soc-2</i>                                        |
| 68 | TRINITY_DN80787_c0_g1_i1  | <i>Malectin-B</i>                                                               |
| 69 | TRINITY_DN89144_c3_g2_i1  | <i>NACHT and WD repeat domain-containing protein 1</i>                          |
| 70 | TRINITY_DN77145_c1_g1_i1  | <i>NACHT and Ankyrin domain protein</i>                                         |
| 71 | TRINITY_DN89726_c0_g15_i3 | <i>Nesprin-1</i>                                                                |

---

---

|     |                           |                                                                                |
|-----|---------------------------|--------------------------------------------------------------------------------|
| 72  | TRINITY_DN82120_c0_g1_i2  | <i>Notch</i>                                                                   |
| 73  | TRINITY_DN15896_c0_g1_i1  | <i>Notch</i>                                                                   |
| 74  | TRINITY_DN143739_c0_g1_i1 | <i>Notch 1</i>                                                                 |
| 75  | TRINITY_DN89037_c3_g2_i1  | <i>Notch protein</i>                                                           |
| 76  | TRINITY_DN84036_c0_g1_i1  | <i>Notch protein</i>                                                           |
| 77  | TRINITY_DN12748_c0_g2_i1  | <i>Notch domain-containing protein</i>                                         |
| 78  | TRINITY_DN63859_c0_g2_i1  | <i>Nuclear cap-binding protein subunit 2</i>                                   |
| 79  | TRINITY_DN113923_c0_g1_i1 | <i>Octopamine receptor 1</i>                                                   |
| 80  | TRINITY_DN71072_c0_g2_i1  | <i>Pelle</i>                                                                   |
| 81  | TRINITY_DN117445_c0_g1_i1 | <i>Protein kinase AKT, related</i>                                             |
| 82  | TRINITY_DN81879_c1_g5_i1  | <i>Rab11 family-interacting protein 1</i>                                      |
| 83  | TRINITY_DN83448_c0_g2_i1  | <i>Rab-like protein 3</i>                                                      |
| 84  | TRINITY_DN49201_c0_g2_i1  | <i>Rab GDP dissociation inhibitor</i>                                          |
| 85  | TRINITY_DN110705_c0_g1_i1 | <i>Rab-GTPase-TBC domain protein</i>                                           |
| 86  | TRINITY_DN93717_c0_g1_i1  | <i>Ras-specific guanine nucleotide-releasing factor 2</i>                      |
| 87  | TRINITY_DN74295_c0_g1_i1  | <i>Rab-GTPase-TBC domain protein</i>                                           |
| 88  | TRINITY_DN49201_c0_g1_i1  | <i>Rab GDP dissociation inhibitor</i>                                          |
| 89  | TRINITY_DN115735_c0_g1_i1 | <i>Rab11b</i>                                                                  |
| 90  | TRINITY_DN129461_c0_g1_i1 | <i>Rab GDP dissociation inhibitor</i>                                          |
| 91  | TRINITY_DN77261_c0_g1_i2  | <i>Rab-like protein 2A</i>                                                     |
| 92  | TRINITY_DN77455_c0_g3_i1  | <i>Rab18-family small gtpase</i>                                               |
| 93  | TRINITY_DN58433_c0_g1_i1  | <i>Rab GDP dissociation inhibitor</i>                                          |
| 94  | TRINITY_DN78860_c0_g1_i5  | <i>Ras-related protein Rab-36</i>                                              |
| 95  | TRINITY_DN77306_c0_g2_i1  | <i>Ras-like protein family member 11B</i>                                      |
| 96  | TRINITY_DN128808_c0_g1_i1 | <i>Ras family protein</i>                                                      |
| 97  | TRINITY_DN90571_c3_g4_i3  | <i>Ras-like GTP-binding protein Rho1</i>                                       |
| 98  | TRINITY_DN5265_c0_g1_i1   | <i>Ras-like protein 3</i>                                                      |
| 99  | TRINITY_DN84087_c2_g2_i6  | <i>Ras-related protein Rab-27A</i>                                             |
| 100 | TRINITY_DN78011_c0_g3_i1  | <i>Ras GTPase-activating protein-binding protein 1-like isoform X1</i>         |
| 101 | TRINITY_DN86370_c6_g1_i1  | <i>Ras-like protein 2 protein</i>                                              |
| 102 | TRINITY_DN81939_c0_g2_i1  | <i>Ras association domain-containing protein 10</i>                            |
| 103 | TRINITY_DN77306_c0_g1_i1  | <i>Ras-like protein family member 11B</i>                                      |
| 104 | TRINITY_DN78011_c0_g2_i1  | <i>Ras GTPase-activating protein-binding protein 1-like isoform X1</i>         |
| 105 | TRINITY_DN60273_c0_g1_i1  | <i>Ras small GTPase, putative</i>                                              |
| 106 | TRINITY_DN70163_c0_g1_i3  | <i>Ras-specific guanine nucleotide-releasing factor 2</i>                      |
| 107 | TRINITY_DN87176_c0_g1_i1  | <i>Ras-associated and pleckstrin-like protein domains-containing protein 1</i> |

---

---

|     |                           |                                                                                     |
|-----|---------------------------|-------------------------------------------------------------------------------------|
| 108 | TRINITY_DN87642_c1_g1_i11 | <i>Ras GTPase-activating protein 1</i>                                              |
| 109 | TRINITY_DN76002_c0_g1_i1  | <i>Ras suppressor protein 1</i>                                                     |
| 110 | TRINITY_DN81692_c0_g1_i2  | <i>Ras-related protein Rab-8A</i>                                                   |
| 111 | TRINITY_DN89075_c2_g4_i9  | <i>Ras gtpase-activating protein isoform x1</i>                                     |
| 112 | TRINITY_DN79802_c0_g1_i1  | <i>Ras GTPase-activating protein 3</i>                                              |
| 113 | TRINITY_DN81323_c1_g3_i1  | <i>Relish</i>                                                                       |
| 114 | TRINITY_DN80870_c0_g2_i2  | <i>Renin receptor</i>                                                               |
| 115 | TRINITY_DN84598_c0_g1_i1  | <i>Rho GTPase-activating protein 18</i>                                             |
| 116 | TRINITY_DN90173_c1_g1_i1  | <i>Rho-associated protein kinase 2</i>                                              |
| 117 | TRINITY_DN87785_c1_g2_i1  | <i>Rho GTPase-activating protein 17</i>                                             |
| 118 | TRINITY_DN86960_c5_g3_i3  | <i>Rho GTPase-activating protein 20</i>                                             |
| 119 | TRINITY_DN80784_c0_g1_i1  | <i>Rho GTPase-activating protein 12</i>                                             |
| 120 | TRINITY_DN3965_c0_g1_i1   | <i>Rho GTPase-activating protein 20</i>                                             |
| 121 | TRINITY_DN89028_c1_g1_i10 | <i>Roquin</i>                                                                       |
| 122 | TRINITY_DN86150_c4_g5_i7  | <i>Serine-protein kinase</i>                                                        |
| 123 | TRINITY_DN104362_c0_g1_i1 | <i>Serine protein kinase RIO</i>                                                    |
| 124 | TRINITY_DN3140_c0_g2_i1   | <i>Serine/threonine protein kinase</i>                                              |
| 125 | TRINITY_DN86137_c7_g1_i13 | <i>Serine/threonine-protein kinase ULK3</i>                                         |
| 126 | TRINITY_DN84829_c0_g1_i1  | <i>Serine/threonine-protein kinase receptor</i>                                     |
| 127 | TRINITY_DN74470_c0_g2_i1  | <i>Serine/threonine-protein phosphatase</i>                                         |
| 128 | TRINITY_DN90497_c2_g3_i6  | <i>Serine/threonine-protein kinase/endoribonuclease IRE2</i>                        |
| 129 | TRINITY_DN90556_c0_g1_i2  | <i>Serine/threonine-protein kinase 36</i>                                           |
| 130 | TRINITY_DN129044_c0_g1_i1 | <i>Serine/threonine-protein phosphatase</i>                                         |
| 131 | TRINITY_DN90593_c2_g3_i2  | <i>serine/threonine-protein kinase Chk2 isoform X2</i>                              |
| 132 | TRINITY_DN83761_c1_g1_i2  | <i>Serine/threonine-protein kinase D3</i>                                           |
| 133 | TRINITY_DN18171_c0_g2_i1  | <i>Serine/threonine-protein phosphatase</i>                                         |
| 134 | TRINITY_DN99335_c0_g1_i1  | <i>Serine/threonine transporter SstT</i>                                            |
| 135 | TRINITY_DN86442_c0_g2_i2  | <i>Serine/threonine-protein phosphatase</i>                                         |
| 136 | TRINITY_DN168219_c0_g1_i1 | <i>Serine/threonine protein kinase</i>                                              |
| 137 | TRINITY_DN87983_c1_g1_i1  | <i>Serine/threonine-protein phosphatase 6 regulatory ankyrin repeat subunit B</i>   |
| 138 | TRINITY_DN84921_c0_g1_i1  | <i>Serine/threonine-protein kinase TBK1</i>                                         |
| 139 | TRINITY_DN85971_c4_g2_i1  | <i>Serine/threonine-protein phosphatase 2A regulatory subunit B'' subunit alpha</i> |
| 140 | TRINITY_DN120489_c0_g1_i1 | <i>Serine/threonine-protein kinase</i>                                              |
| 141 | TRINITY_DN89738_c0_g3_i6  | <i>Serine/threonine-protein kinase SBK1</i>                                         |
| 142 | TRINITY_DN87101_c1_g5_i6  | <i>Serine/threonine-protein kinase PRP4-like protein</i>                            |

---



---

|     |                           |                                                            |
|-----|---------------------------|------------------------------------------------------------|
| 143 | TRINITY_DN140017_c0_g1_i1 | <i>Serine/threonine-protein kinase receptor</i>            |
| 144 | TRINITY_DN87560_c2_g1_i3  | <i>Serine/threonine-protein kinase Nek2</i>                |
| 145 | TRINITY_DN85397_c0_g1_i1  | <i>Serine/threonine-protein kinase PLK4</i>                |
| 146 | TRINITY_DN90436_c1_g5_i3  | <i>Serine/threonine-protein kinase wnk 1,3,4, putative</i> |
| 147 | TRINITY_DN84662_c4_g2_i7  | <i>Serine/threonine-protein kinase SMG1</i>                |
| 148 | TRINITY_DN79111_c0_g1_i1  | <i>Signal transducing adapter molecule 1</i>               |
| 149 | TRINITY_DN83589_c0_g2_i2  | <i>Signal transducer and activator of transcription</i>    |
| 150 | TRINITY_DN88650_c9_g2_i1  | <i>Spaetzle</i>                                            |
| 151 | TRINITY_DN83732_c1_g5_i1  | <i>Striatin-3</i>                                          |
| 152 | TRINITY_DN135560_c0_g1_i1 | <i>TATA-box binding protein</i>                            |
| 153 | TRINITY_DN82116_c0_g1_i2  | <i>Testis-specific serine/threonine-protein kinase 4</i>   |
| 154 | TRINITY_DN77011_c0_g2_i1  | <i>Toll</i>                                                |
| 155 | TRINITY_DN81353_c0_g1_i1  | <i>Toll</i>                                                |
| 156 | TRINITY_DN88272_c3_g5_i1  | <i>Toll-like receptor 4</i>                                |
| 157 | TRINITY_DN77931_c0_g1_i3  | <i>Toll-like receptor</i>                                  |
| 158 | TRINITY_DN84024_c2_g10_i1 | <i>Toll-like receptor 8</i>                                |
| 159 | TRINITY_DN84024_c2_g5_i1  | <i>Toll-like receptor 4</i>                                |
| 160 | TRINITY_DN84024_c2_g1_i3  | <i>Toll-like receptor 4</i>                                |
| 161 | TRINITY_DN83352_c0_g1_i1  | <i>Toll-interacting protein</i>                            |
| 162 | TRINITY_DN83805_c1_g5_i1  | <i>Toll family protein 6</i>                               |
| 163 | TRINITY_DN149072_c0_g1_i1 | <i>Toll-like receptor 4</i>                                |
| 164 | TRINITY_DN86923_c1_g1_i1  | <i>Toll family protein 8</i>                               |
| 165 | TRINITY_DN77011_c0_g1_i1  | <i>Toll-like receptor 1</i>                                |
| 166 | TRINITY_DN78593_c0_g1_i5  | <i>Toll pathway, mitochondrial</i>                         |
| 167 | TRINITY_DN89445_c3_g1_i1  | <i>Toll-like receptor 7</i>                                |
| 168 | TRINITY_DN86701_c2_g1_i5  | <i>Toll family protein</i>                                 |
| 169 | TRINITY_DN83044_c0_g1_i2  | <i>Toll-like receptor 4</i>                                |
| 170 | TRINITY_DN89850_c4_g1_i1  | <i>Transgelin</i>                                          |
| 171 | TRINITY_DN84601_c0_g1_i1  | <i>Transducin beta-like protein 2</i>                      |
| 172 | TRINITY_DN84168_c0_g11_i1 | <i>Tubulin beta chain</i>                                  |
| 173 | TRINITY_DN77120_c0_g1_i1  | <i>Tubulin beta chain</i>                                  |
| 174 | TRINITY_DN17472_c0_g2_i1  | <i>Tubulin beta chain</i>                                  |
| 175 | TRINITY_DN176160_c0_g1_i1 | <i>Tubulin gamma chain</i>                                 |
| 176 | TRINITY_DN90249_c0_g8_i1  | <i>Tubulin beta chain</i>                                  |
| 177 | TRINITY_DN89207_c2_g1_i1  | <i>Tubulin beta chain</i>                                  |
| 178 | TRINITY_DN84168_c0_g2_i1  | <i>Tubulin beta chain</i>                                  |
| 179 | TRINITY_DN79085_c0_g2_i6  | <i>Tubulin alpha chain</i>                                 |

---

---

|     |                           |                                                                   |
|-----|---------------------------|-------------------------------------------------------------------|
| 180 | TRINITY_DN90249_c1_g5_i1  | <i>Tubulin beta chain</i>                                         |
| 181 | TRINITY_DN90255_c1_g17_i3 | <i>Tubulin beta chain</i>                                         |
| 182 | TRINITY_DN162710_c0_g1_i1 | <i>Tubulin alpha chain</i>                                        |
| 183 | TRINITY_DN187097_c0_g1_i1 | <i>Tubulin beta chain</i>                                         |
| 184 | TRINITY_DN90255_c2_g1_i1  | <i>Tubulin beta-4 chain</i>                                       |
| 185 | TRINITY_DN85145_c1_g8_i2  | <i>Target of rapamycin complex 2 subunit MAPKAP1</i>              |
| 186 | TRINITY_DN52654_c0_g1_i1  | <i>Target of rapamycin complex subunit lst8</i>                   |
| 187 | TRINITY_DN167239_c0_g1_i1 | <i>WD40 associated region in TFIIID subunit</i>                   |
| 188 | TRINITY_DN83976_c0_g3_i2  | <i>WD repeat-containing protein 48</i>                            |
| 189 | TRINITY_DN71338_c0_g1_i1  | <i>Wnt</i>                                                        |
| 190 | TRINITY_DN89225_c0_g1_i1  | <i>Wnt</i>                                                        |
| 191 | TRINITY_DN86967_c0_g1_i1  | <i>Wnt</i>                                                        |
| 192 | TRINITY_DN87582_c0_g1_i2  | <i>Wnt</i>                                                        |
| 193 | TRINITY_DN109037_c0_g1_i1 | <i>WW domain protein</i>                                          |
| 194 | TRINITY_DN169912_c0_g1_i1 | <i>WW domain protein</i>                                          |
| 195 | TRINITY_DN90343_c4_g1_i1  | <i>Zinc finger protein</i>                                        |
| 196 | TRINITY_DN199998_c0_g1_i1 | <i>Zinc finger</i>                                                |
| 197 | TRINITY_DN85604_c0_g1_i2  | <i>Zinc finger MYND domain-containing protein 11</i>              |
| 198 | TRINITY_DN183519_c0_g1_i1 | <i>Zinc finger MYM-type protein 1</i>                             |
| 199 | TRINITY_DN86312_c2_g1_i2  | <i>Zinc finger RNA-binding protein</i>                            |
| 200 | TRINITY_DN40205_c0_g1_i1  | <i>zinc finger MYM-type protein 1-like isoform X1</i>             |
| 201 | TRINITY_DN84851_c1_g1_i4  | <i>Zinc finger CCHC domain-containing protein 2</i>               |
| 202 | TRINITY_DN86155_c1_g2_i1  | <i>Zinc finger protein ZIC, putative</i>                          |
| 203 | TRINITY_DN57944_c0_g1_i1  | <i>Zinc finger protein 549</i>                                    |
| 204 | TRINITY_DN86727_c0_g1_i1  | <i>Zinc finger MYND domain-containing protein 11</i>              |
| 205 | TRINITY_DN87198_c3_g2_i7  | <i>Zinc finger C2HC domain-containing protein 1C-like Protein</i> |
| 206 | TRINITY_DN82107_c1_g3_i2  | <i>Zinc finger SWIM domain-containing protein 7</i>               |
| 207 | TRINITY_DN84461_c0_g2_i1  | <i>Zinc finger MYND domain-containing protein 11</i>              |
| 208 | TRINITY_DN20640_c0_g1_i1  | <i>14-3-3 family protein</i>                                      |
| 209 | TRINITY_DN90246_c0_g1_i2  | <i>14-3-3 protein 1</i>                                           |
| 210 | TRINITY_DN5987_c0_g1_i1   | <i>14-3-3 protein epsilon</i>                                     |
| 211 | TRINITY_DN45288_c0_g1_i1  | <i>14-3-3 protein epsilon</i>                                     |
| 212 | TRINITY_DN88819_c0_g9_i2  | <i>14-3-3zeta_1 protein</i>                                       |
| 213 | TRINITY_DN78767_c0_g2_i1  | <i>14-3-3 protein epsilon</i>                                     |
| 214 | TRINITY_DN405_c0_g1_i1    | <i>14-3-3 family protein</i>                                      |

---

**Table S4.** Immune-related Effectors from the transcriptome of two-spotted field crickets

| <b>No</b> | <b>Gene Sequence ID</b>   | <b>Annotation description</b>                   |
|-----------|---------------------------|-------------------------------------------------|
| 1         | TRINITY_DN89440_c1_g2_i1  | <i>Attacin</i>                                  |
| 2         | TRINITY_DN165858_c0_g1_i1 | <i>Bacteriocin</i>                              |
| 3         | TRINITY_DN69837_c0_g2_i1  | <i>Carboxypeptidase</i>                         |
| 4         | TRINITY_DN86792_c2_g17_i1 | <i>Carboxypeptidase</i>                         |
| 5         | RINITY_DN86792_c2_g10_i1  | <i>Carboxypeptidase 3</i>                       |
| 6         | TRINITY_DN82454_c0_g1_i1  | <i>Carboxypeptidase 4</i>                       |
| 7         | TRINITY_DN85268_c4_g6_i1  | <i>Carboxypeptidase B-like</i>                  |
| 8         | TRINITY_DN88735_c2_g2_i4  | <i>Carboxypeptidase E</i>                       |
| 9         | TRINITY_DN87822_c2_g3_i3  | <i>Carboxypeptidase M</i>                       |
| 10        | TRINITY_DN201489_c0_g1_i1 | <i>Carboxypeptidase yscS</i>                    |
| 11        | TRINITY_DN89787_c1_g9_i1  | <i>Zinc carboxypeptidase</i>                    |
| 12        | TRINITY_DN88701_c6_g7_i1  | <i>Zinc carboxypeptidase A 1</i>                |
| 13        | TRINITY_DN195416_c0_g1_i1 | <i>Serine-type D-Ala-D-Ala carboxypeptidase</i> |
| 14        | TRINITY_DN89725_c1_g1_i7  | <i>Cathepsin 5</i>                              |
| 15        | TRINITY_DN86640_c0_g1_i2  | <i>Cathepsin L-like protein</i>                 |
| 16        | TRINITY_DN84880_c3_g1_i6  | <i>Cathepsin 4</i>                              |
| 17        | TRINITY_DN18659_c0_g1_i1  | <i>Cathepsin B2</i>                             |
| 18        | TRINITY_DN146289_c0_g1_i1 | <i>Cadherin-89D</i>                             |
| 19        | TRINITY_DN60654_c0_g1_i1  | <i>Cathepsin L-like cysteine protease</i>       |
| 20        | TRINITY_DN128294_c0_g1_i1 | <i>Cathepsin L-like cysteine protease</i>       |
| 21        | TRINITY_DN86630_c4_g2_i4  | <i>Caspase-1 isoform X1</i>                     |
| 22        | TRINITY_DN83280_c0_g1_i1  | <i>Caspase-1</i>                                |
| 23        | TRINITY_DN88257_c3_g6_i2  | <i>Caspase-8</i>                                |
| 24        | TRINITY_DN85092_c0_g1_i2  | <i>Caspase-8</i>                                |
| 25        | TRINITY_DN84211_c0_g1_i2  | <i>Caspase-1</i>                                |
| 26        | TRINITY_DN83904_c0_g3_i4  | <i>Caspase-1</i>                                |
| 27        | TRINITY_DN111239_c0_g1_i1 | <i>Metacaspase</i>                              |
| 28        | TRINITY_DN163248_c0_g1_i1 | <i>Lysozyme</i>                                 |
| 29        | TRINITY_DN35342_c0_g1_i1  | <i>Lysozyme</i>                                 |
| 30        | TRINITY_DN156575_c0_g1_i1 | <i>Lysozyme</i>                                 |
| 31        | TRINITY_DN75097_c0_g1_i1  | <i>C-type lysozyme</i>                          |
| 32        | TRINITY_DN88762_c0_g6_i1  | <i>I-type lysozyme 1</i>                        |
| 33        | TRINITY_DN89187_c1_g12_i1 | <i>I-type lysozyme</i>                          |
| 34        | TRINITY_DN88762_c0_g5_i1  | <i>I-type lysozyme 1</i>                        |
| 35        | TRINITY_DN151148_c0_g1_i1 | <i>Pyocin</i>                                   |



---

|    |                           |                                                 |
|----|---------------------------|-------------------------------------------------|
| 33 | TRINITY_DN90574_c1_g1_i2  | <i>Gephyrin</i>                                 |
| 34 | TRINITY_DN81569_c0_g1_i3  | <i>GILT-like protein C02D5.2</i>                |
| 35 | TRINITY_DN88839_c1_g6_i2  | <i>Heat shock protein 90</i>                    |
| 36 | TRINITY_DN74518_c0_g3_i2  | <i>Heat shock 70 kDa protein cognate 2</i>      |
| 37 | TRINITY_DN57888_c0_g1_i1  | <i>Heat shock protein 70</i>                    |
| 38 | TRINITY_DN86611_c1_g3_i1  | <i>60 kDa heat shock protein, mitochondrial</i> |
| 39 | TRINITY_DN88523_c2_g1_i2  | <i>Heat shock 70 kDa protein 14</i>             |
| 40 | TRINITY_DN86383_c0_g5_i3  | <i>Heat shock 70 kDa protein 12A</i>            |
| 41 | TRINITY_DN183465_c0_g1_i1 | <i>Heat shock protein HSP60</i>                 |
| 42 | TRINITY_DN93491_c0_g1_i1  | <i>Activator of Hsp90 ATPase-like protein</i>   |
| 43 | TRINITY_DN90054_c2_g3_i1  | <i>Heat shock 70 kDa protein cognate 4</i>      |
| 44 | TRINITY_DN81618_c1_g2_i4  | <i>Heat shock cognate 70 kDa protein</i>        |
| 45 | TRINITY_DN114931_c0_g1_i1 | <i>HSP90</i>                                    |
| 46 | TRINITY_DN121344_c0_g1_i1 | <i>Hsp78p</i>                                   |
| 47 | TRINITY_DN72897_c0_g4_i1  | <i>Heat shock protein 70</i>                    |
| 48 | TRINITY_DN176147_c0_g1_i1 | <i>Heat shock protein 90</i>                    |
| 49 | TRINITY_DN26383_c0_g2_i1  | <i>Heat shock protein SSC1, mitochondrial</i>   |
| 50 | TRINITY_DN68944_c0_g1_i1  | <i>Heat shock protein beta-11</i>               |
| 51 | TRINITY_DN57888_c1_g1_i1  | <i>Heat shock protein SSA1</i>                  |
| 52 | TRINITY_DN157740_c0_g1_i1 | <i>HSP70 family</i>                             |
| 53 | TRINITY_DN82806_c0_g1_i1  | <i>Heat shock protein 70</i>                    |
| 54 | TRINITY_DN89622_c0_g3_i2  | <i>Heat shock 70 kDa protein 4L</i>             |
| 55 | TRINITY_DN183471_c0_g1_i1 | <i>Heat shock protein 70</i>                    |
| 56 | TRINITY_DN85656_c0_g2_i3  | <i>Heat shock 70 kDa protein cognate</i>        |
| 57 | TRINITY_DN105459_c0_g1_i1 | <i>HSP90-domain-containing protein</i>          |
| 58 | TRINITY_DN171774_c0_g1_i1 | <i>Heat shock protein 60</i>                    |
| 59 | TRINITY_DN89864_c3_g3_i4  | <i>Heat shock protein 67B2</i>                  |
| 60 | TRINITY_DN146233_c0_g1_i1 | <i>Heat shock protein</i>                       |
| 61 | TRINITY_DN134020_c0_g1_i1 | <i>Heat shock protein 90</i>                    |
| 62 | TRINITY_DN43371_c0_g1_i1  | <i>Heat shock protein</i>                       |
| 63 | TRINITY_DN87035_c1_g1_i1  | <i>Heat shock factor 2-binding protein</i>      |
| 64 | TRINITY_DN88273_c5_g1_i3  | <i>Heat shock protein 20.7</i>                  |
| 65 | TRINITY_DN130555_c0_g1_i1 | <i>Heat shock protein 70</i>                    |
| 66 | TRINITY_DN89516_c0_g2_i1  | <i>Heat shock 70 kDa protein cognate 2</i>      |
| 67 | TRINITY_DN72897_c0_g2_i1  | <i>Heat shock protein 70</i>                    |
| 68 | TRINITY_DN90054_c2_g1_i1  | <i>Heat shock 70 kDa protein cognate 4</i>      |
| 69 | TRINITY_DN153276_c0_g1_i1 | <i>Heat shock protein 70, putative</i>          |

---

---

|     |                           |                                                               |
|-----|---------------------------|---------------------------------------------------------------|
| 70  | TRINITY_DN91591_c0_g1_i1  | <i>Heat shock protein 70</i>                                  |
| 71  | TRINITY_DN200570_c0_g1_i1 | <i>30 kDa heat shock protein</i>                              |
| 72  | TRINITY_DN72897_c0_g1_i1  | <i>Heat shock protein HSP70</i>                               |
| 73  | TRINITY_DN90349_c6_g1_i1  | <i>Heat shock cognate 70 protein</i>                          |
| 74  | TRINITY_DN67048_c0_g1_i1  | <i>Heat shock protein 40</i>                                  |
| 75  | TRINITY_DN40795_c0_g1_i1  | <i>Heat shock 70 kDa protein, putative</i>                    |
| 76  | TRINITY_DN68944_c0_g2_i1  | <i>Heat shock protein beta-11</i>                             |
| 77  | TRINITY_DN74471_c0_g1_i1  | <i>Heat shock protein SSB1</i>                                |
| 78  | TRINITY_DN79478_c0_g4_i1  | <i>Heat shock protein 90</i>                                  |
| 79  | TRINITY_DN139926_c0_g1_i1 | <i>Heat shock protein 70</i>                                  |
| 80  | TRINITY_DN177381_c0_g1_i1 | <i>Heat shock protein 70</i>                                  |
| 81  | TRINITY_DN89516_c0_g3_i1  | <i>Heat shock protein 70</i>                                  |
| 82  | TRINITY_DN83196_c0_g1_i2  | <i>Heat shock protein 75 kDa, mitochondrial</i>               |
| 83  | TRINITY_DN101475_c0_g1_i1 | <i>Heat shock 70 cb</i>                                       |
| 84  | TRINITY_DN66009_c0_g2_i1  | <i>Hemicentin 1</i>                                           |
| 85  | TRINITY_DN89286_c0_g1_i4  | <i>Hemicentin-1-like protein</i>                              |
| 86  | TRINITY_DN89286_c0_g4_i1  | <i>Hemicentin-1 (Fragment)</i>                                |
| 87  | TRINITY_DN90764_c0_g1_i8  | <i>Heparanase</i>                                             |
| 88  | TRINITY_DN86745_c0_g1_i2  | <i>Hexamerin 1</i>                                            |
| 89  | TRINITY_DN86745_c0_g2_i1  | <i>Hexamerin 1</i>                                            |
| 90  | TRINITY_DN88109_c4_g4_i1  | <i>Iporin</i>                                                 |
| 91  | TRINITY_DN58810_c0_g1_i1  | <i>Lustrin variant 1</i>                                      |
| 92  | TRINITY_DN85628_c0_g3_i1  | <i>Lustrin A</i>                                              |
| 93  | TRINITY_DN70585_c0_g2_i1  | <i>Opticin</i>                                                |
| 94  | TRINITY_DN82884_c0_g1_i6  | <i>Melanization protease 1</i>                                |
| 95  | TRINITY_DN62055_c0_g1_i2  | <i>Natterin-3</i>                                             |
| 96  | TRINITY_DN77329_c2_g3_i1  | <i>Neprilysin-11</i>                                          |
| 97  | TRINITY_DN77329_c2_g2_i1  | <i>Neprilysin-11</i>                                          |
| 98  | TRINITY_DN90456_c0_g1_i1  | <i>Netrin receptor UNC5C</i>                                  |
| 99  | TRINITY_DN89260_c2_g4_i4  | <i>Neurocalcin</i>                                            |
| 100 | TRINITY_DN87371_c1_g2_i2  | <i>Ninjurin-2 isoform X1</i>                                  |
| 101 | TRINITY_DN195667_c0_g1_i1 | <i>Optineurin</i>                                             |
| 102 | TRINITY_DN97825_c0_g1_i1  | <i>Patatin-like phospholipase family protein</i>              |
| 103 | TRINITY_DN85093_c0_g1_i5  | <i>Patatin-like phospholipase domain-containing protein 2</i> |
| 104 | TRINITY_DN92660_c0_g1_i1  | <i>Phosducin</i>                                              |
| 105 | TRINITY_DN68809_c0_g1_i1  | <i>Plexin-A4</i>                                              |
| 106 | TRINITY_DN88784_c0_g1_i12 | <i>Presenilin</i>                                             |

---

---

|     |                           |                                                     |
|-----|---------------------------|-----------------------------------------------------|
| 107 | TRINITY_DN90241_c0_g4_i1  | <i>Pumilio domain-containing protein C14orf21</i>   |
| 108 | TRINITY_DN87015_c3_g1_i1  | <i>Regucalcin</i>                                   |
| 109 | TRINITY_DN85569_c0_g2_i1  | <i>Regucalcin</i>                                   |
| 110 | TRINITY_DN83849_c0_g1_i1  | <i>Regucalcin</i>                                   |
| 111 | TRINITY_DN86515_c4_g2_i2  | <i>Snare protein syntaxin 1</i>                     |
| 112 | TRINITY_DN88343_c0_g2_i4  | <i>Semaphorin-1A</i>                                |
| 113 | TRINITY_DN86843_c0_g1_i5  | <i>Semaphorin 2a</i>                                |
| 114 | RINITY_DN83539_c0_g1_i1   | <i>Semaphorin 1a</i>                                |
| 115 | TRINITY_DN87102_c0_g1_i3  | <i>Syndecan</i>                                     |
| 116 | TRINITY_DN83808_c2_g3_i1  | <i>Stathmin</i>                                     |
| 117 | TRINITY_DN87541_c1_g1_i1  | <i>Syntaxin-17</i>                                  |
| 118 | TRINITY_DN89678_c2_g1_i1  | <i>Syntaxin-12</i>                                  |
| 119 | TRINITY_DN92370_c0_g1_i1  | <i>Syntaxin</i>                                     |
| 120 | TRINITY_DN83951_c1_g1_i1  | <i>Syntaxin-16</i>                                  |
| 121 | TRINITY_DN84801_c0_g4_i1  | <i>Syntaxin-6</i>                                   |
| 122 | TRINITY_DN166047_c0_g1_i1 | <i>Toxin-antitoxin system YwqK family antitoxin</i> |
| 123 | TRINITY_DN86439_c1_g1_i1  | <i>Torso-like protein</i>                           |

---
